# Disease implications of animal social network structure: a synthesis across social systems

Pratha Sah <sup>\*a</sup>, Janet Mann<sup>a, b</sup> and Shweta Bansal<sup>a</sup>

<sup>a</sup>Department of Biology, Georgetown University, Washington, DC

<sup>b</sup>Department of Psychology, Georgetown University, Washington, DC

\*Corresponding author: [ps875@georgetown.edu](mailto:ps875@georgetown.edu)

## Summary

1. The disease costs of sociality have largely been understood through the link between group size and transmission. However, infectious disease spread is driven primarily by the social organization of interactions in a group and not its size.
2. We used statistical models to review the social network organization of 47 species, including mammals, birds, reptiles, fish and insects by categorizing each species into one of three social systems, *relatively solitary*, *gregarious*

---

\*[ps875@georgetown.edu](mailto:ps875@georgetown.edu)

and *socially hierarchical*. Additionally, using computational experiments of infection spread, we determined the disease costs of each social system.

3. We find that relatively solitary species have large variation in number of social partners, that socially hierarchical species are the least clustered in their interactions, and that social networks of gregarious species tend to be the most fragmented. However, these structural differences are primarily driven by weak connections, which suggests that different social systems have evolved unique strategies to organize weak ties.
4. Our synthetic disease experiments reveal that social network organization can mitigate the disease costs of group living for socially hierarchical species when the pathogen is highly transmissible. In contrast, highly transmissible pathogens cause frequent and prolonged epidemic outbreaks in gregarious species.
5. We evaluate the implications of network organization across social systems despite methodological challenges, and our findings offer new perspective on the debate about the disease costs of group living. Additionally, our study demonstrates the potential of meta-analytic methods in social network analysis to test ecological and evolutionary hypotheses on cooperation, group living, communication, and resilience to extrinsic pressures.

## Keywords

animal social network, contact network, epidemiology, infectious disease dynamics, meta-analysis, social behaviour, social complexity, wildlife disease

## Introduction

1 Host social behaviour plays an important role in the spread of infectious diseases.  
2 Socially complex species from honeybees to African elephants live in large groups  
3 and are considered to have elevated costs of pathogen transmission due to high  
4 contact rates (Loehle, 1995; Altizer *et al.*, 2003). Previous studies have tested  
5 hypotheses about the disease costs of sociality by associating group size with in-  
6 fection transmission (Rifkin, Nunn & Garamszegi, 2012; Patterson & Ruckstuhl,  
7 2013). Beyond a simple dependence on group size, however, recent work in the  
8 field of network epidemiology has shown that infectious disease spread largely de-  
9 pends on the organization of infection-spreading interactions between individuals  
10 (Godfrey *et al.*, 2009; White, Forester & Craft, 2015; Craft, 2015; VanderWaal &  
11 Ezenwa, 2016). Indeed, even when interactions between individuals are assumed  
12 to be homogeneous, the expectation of higher disease costs of group living has  
13 been mixed (Arnold & Anja, 1993; Rifkin, Nunn & Garamszegi, 2012; Patterson  
14 & Ruckstuhl, 2013).

15 Mathematically, social networks describe patterns of social connections be-  
16 tween a set of individuals by representing individuals as nodes and interactions  
17 as edges (Croft, James & Krause, 2008; Krause *et al.*, 2014; Farine & Whitehead,  
18 2015). The advantage of social network analysis is that it integrates heterogeneity  
19 in interaction patterns at individual, local and population scales to model global  
20 level processes, including the spread of social information and infectious diseases  
21 (Krause, Croft & James, 2007; Krause *et al.*, 2014; Silk *et al.*, 2017a,b). In recent  
22 years, network analysis tools have allowed for rapid advances in our understanding  
23 of how individual interaction rates are related to the risk of acquiring infection

24 (Otterstatter & Thomson, 2007; Leu, Kappeler & Bull, 2010). A fundamental  
25 individual-level characteristic relevant to the spread of social or biological conta-  
26 gion in networks is the number of direct social partners, associates or contacts,  
27 capturing the interaction necessary for transmission. While much attention has  
28 been focused on the implications of individual sociality, the disease implications of  
29 a species' social system remains unclear.

30 By quantifying group-level metrics that describe global structures in interac-  
31 tion patterns, the network approach provides a unique opportunity to examine the  
32 disease costs of species social system. The role of higher-order network structures  
33 such as degree heterogeneity (Fig. 1A), subgroup cohesion (Fig. 1D), network  
34 fragmentation (Fig. 1E), and average clustering coefficient (Fig. 1F) on infectious  
35 disease spread is complex, but is relatively well understood (see network structure  
36 definitions in Table S1)(Keeling, 2005; Meyers *et al.*, 2005; Sah *et al.*, 2017). For  
37 example, as degree heterogeneity (or variation in the number of social partners)  
38 in a network increases, the epidemic threshold (i.e., the minimum pathogen trans-  
39 missibility that can cause large outbreaks) decreases (Anderson, May & Anderson,  
40 1992). However, the probability of epidemic outbreaks is lower in networks with  
41 high degree variance for moderately and highly transmissible pathogens (Meyers  
42 *et al.*, 2005). Network metrics such as average clustering coefficient, subgroup  
43 cohesion and network fragmentation capture the tendency of individuals to form  
44 cliques and subgroups (Fig. 1). Although the dynamics of infectious disease spread  
45 remain largely unaffected in networks with moderate levels of clustering, cohesion  
46 and fragmentation, extreme levels of these metrics in networks reduce epidemic  
47 size and prolong epidemic outbreaks (Keeling, 2005; Sah *et al.*, 2017).

48 Recent mathematical models predict that the network structure of socially

49 complex species can serve as a primary defence mechanism against infectious dis-  
50 ease by lowering the risk of disease invasion and spread (Hock & Fefferman, 2012).  
51 It remains uncertain, however, whether the structure of social networks naturally  
52 observed in less-complex social systems mediates infectious disease risk and trans-  
53 mission. A systematic examination of the disease costs associated with species  
54 social system requires a comparative approach that isolates unique structural char-  
55 acteristics of social connections, while controlling for population size, data collec-  
56 tion methodology and type of interaction recorded. However, comparing networks  
57 across different taxonomic groups has proven to be a difficult task, with only a few  
58 cross-species network comparisons previously published in the literature (Faust &  
59 Skvoretz, 2002; Faust, 2006; Sah *et al.*, 2017).

60 In this study, we conduct a quantitative comparative analysis across 47 species  
61 to investigate whether social network organization alone, without the presence of  
62 physiological or behavioural immune responses, can reduce the disease costs of  
63 group living for various social systems. This is achieved in three steps. First, we  
64 categorize the continuum of species sociality into three distinct social systems (rela-  
65 tively solitary, gregarious and socially hierarchical); we then use phylogenetically-  
66 controlled Bayesian generalized linear mixed models to identify social network  
67 structures which are predictive of the three social systems. Second, we perform  
68 computational experiments of infection spread to compare epidemiological out-  
69 comes (epidemic probability, epidemic duration and epidemic size) associated with  
70 the identified social network structures. In the final step, we investigate whether  
71 the differences in these network structures across the three social systems trans-  
72 lates to differences in their disease outcomes.

73 We hypothesize that a social species can mitigate disease costs associated with

74 group living through the organization of their social structure. However, we expect  
75 the presence of alternate disease defence mechanisms to also play an important role:  
76 social insects, for example, use social immunity as a primary strategy to minimize  
77 disease transmission; the structure of the social network in such species may not  
78 be effective in preventing future outbreaks or reducing disease transmission. Our  
79 analysis, by broadening the scope of network analysis from species-specific anal-  
80 ysis to a meta-analytic approach, offers new perspective on how social structure  
81 strategies mediate the disease costs of group living. A better understanding of the  
82 association between network structure and different social systems can facilitate  
83 investigations on other evolutionary and ecological hypotheses on group living, so-  
84 cial complexity, communication, population robustness and resilience to extrinsic  
85 population stressors.

## 86 **Materials and methods**

### 87 **Dataset**

88 We first conducted electronic searches in *Google Scholar* and popular data reposi-  
89 ries, including *Dryad Digital Repository* and *figshare* for relevant network datasets  
90 associated with peer-reviewed publications. We used the following terms to per-  
91 form our search: "social network", "social structure", "contact network", "interac-  
92 tion network", "network behaviour", "animal network", "behaviour heterogeneity"  
93 and "social organization". Only studies on non-human species were considered in  
94 our primary search. Network studies not reporting interactions (such as biologi-  
95 cal networks, food-web networks) were excluded. By reviewing the quality (i.e.,

96 whether enough information was provided to accurately reconstruct networks) of  
97 published networks datasets, we selected 666 social networks spanning 47 animal  
98 species and 18 taxonomic orders. Edge connections in these networks represented  
99 several types of interactions between individuals, including dominance, grooming,  
100 physical contact, spatial proximity, direct food-sharing (i.e. trophallaxis), forag-  
101 ing, and interactions based on the asynchronous use of a shared resource. Fig.  
102 2 summarizes the species, the number of networks and the reported interaction  
103 types contributed by each taxonomic order represented in the study.

## 104 **Classifying species' social system**

105 Developing a definition of social structure that encompasses the continuum of social  
106 systems across diverse taxonomic groups is challenging. Consequently, we followed  
107 Slater & Halliday (1994) and Kappeler & van Schaik (2002) to classify species  
108 into three broad categories of social structure based on the degree of association  
109 between adults during activities such as foraging, travelling, sleeping/resting and  
110 rearing offspring. *Relatively solitary* species were defined by infrequent aggregation  
111 or association between adults outside of the breeding period, and lack of synchro-  
112 nized movements in space by adults. Examples of relatively solitary species in the  
113 database include the desert tortoise (*Gopherus agassizii*), wild raccoons (*Procyon*  
114 *lotor*), and the Australian sleepy lizard (*Tiliqua rugosa*). Recent studies suggest  
115 that the social structure of a species traditionally considered as solitary can be  
116 complex (Sah *et al.*, 2016; Prange *et al.*, 2011). We therefore categorized the three  
117 species as *relatively solitary* and not solitary. Species that aggregate for one or  
118 more activities, but have unstable or temporally varying group composition were

119 classified as *gregarious*. Examples of gregarious species in our database include bot-  
120 tlenose dolphins (*Tursiops truncatus*), bison (*Bison bison*), Indiana bats (*Myotis*  
121 *sodalis*), female Asian elephants (*Elephas maximus*), sociable weavers (*Philetairus*  
122 *socius*), golden-crowned sparrows (*Zonotrichia atricapilla*) and guppies (*Poecilia*  
123 *reticulata*). Species characterized by a permanent or long-term (i.e., at least over a  
124 single breeding season) stable social hierarchy were classified as *socially hierarchi-*  
125 *cal*. Examples of socially hierarchical species include carpenter ants (*Camponotus*  
126 *fellah*), yellow baboons (*Papio cynocephalus*), male elephant seals (*Mirounga an-*  
127 *gustirostris*) and spotted hyenas (*Crocuta crocuta*). We note that animal social  
128 behaviour is being increasingly recognized to span a continuum from solitary to  
129 eusocial (Aureli *et al.*, 2008; Aviles & Harwood, 2012; Silk, Cheney & Seyfarth,  
130 2013), with most species showing some level of fission-fusion dynamics (Silk *et al.*,  
131 2014). The division of social systems into three discrete, albeit arbitrary, cate-  
132 gories allows for simple distinctions in the organization of network structure and  
133 disease risks among species that are characterized by different complexity in group  
134 living behavior.

## 135 **Identifying unique network structures of species' social sys-** 136 **tem**

137 To examine the structure of social networks associated with our three classified  
138 social systems, we used a Bayesian generalized linear mixed model (GLMM) ap-  
139 proach using the *MCMCglmm* package in *R* (Hadfield, 2010), with the species'  
140 social system as the response (categorical response with three levels - relatively  
141 solitary, gregarious and socially hierarchical). The following network measures



142 were included as predictors in the model (see Table S1 in Supporting information  
143 for definitions and Fig.1 for illustrations): degree heterogeneity, degree homophily,  
144 average clustering coefficient, weighted clustering coefficient, transitivity, average  
145 betweenness centrality, weighted betweenness centrality, average subgroup size,  
146 network fragmentation, subgroup cohesion, relative modularity and network di-  
147 ameter. Network fragmentation (i.e., the number of subgroups within the largest  
148 connected component of the social network) and Newman modularity was esti-  
149 mated using the Louvain method (Blondel *et al.*, 2008). Relative modularity was  
150 then calculated by normalizing Newman modularity with the maximum modular-  
151 ity that can be realized in the given social network (Sah *et al.*, 2014, 2017). The  
152 rest of the network metrics were computed using the *Networkx* package in Python  
153 (<https://networkx.github.io/>). We controlled for network size and density by in-  
154 cluding the number of nodes and edges as predictors, and mean edge weight was  
155 included to control for data sampling design. To control for phylogenetic relation-  
156 ships between species, a correlation matrix derived from a phylogeny was included  
157 as a random factor. The phylogenetic relationship between species was estimated  
158 based on NCBI taxonomy using phyloT (<http://phylot.biobyte.de>). We controlled  
159 for repeated measurements within groups, animal species, the type of interaction  
160 recorded, and edge weighting criteria by including *group*, *taxa*, *interaction type*  
161 (association *vs.* interaction) and *edge weight type* (weighted *vs.* unweighted) as  
162 random effects in the analysis. As the spatial scale of data collection can influence  
163 network structure (Table S3, Supporting information), we specified sampling scale  
164 (social sampling *vs.* spatial sampling) as random effect in all our analyses. Studies  
165 that collected data on specific social groups were categorized as *social sampling*,  
166 and those that sampled all animals within a fixed spatial boundary were labelled

167 as *spatial sampling*.

168 All continuous fixed-effects were centered (by subtracting their averages) and  
169 scaled to unit variances (by dividing by their standard deviation) to assign each  
170 continuous predictor with the same prior importance in the analysis (Schielzeth,  
171 2010). Since network measures can be highly correlated to each other, variance  
172 inflation factor (VIF) was estimated for each covariate in the fitted model, and  
173 covariates with VIF greater than 5 were removed to avoid multicollinearity. We  
174 used a weakly informative Gelman prior for fixed effects and parameter-expanded  
175 priors for the random effects to improve mixing and decrease the autocorrelation  
176 among iterations (Gelman, 2006). Specifically, a  $\chi^2$  distribution with 1 degree of  
177 freedom was used as suggested by Hadfield (2014). We ran three MCMC chains  
178 for 15 million iterations, with a thinning interval of 1000 after burn-in of 50,000.  
179 Convergence of chains was assessed using the Gelman-Rubin diagnostic statistic  
180 (Gelman & Rubin, 1992) in the *coda* package (Plummer *et al.*, 2006).

181 Groups of certain species in our database were represented with multiple net-  
182 works, each summarizing a set of interactions occurring in a discrete time period.  
183 To ensure that such animal groups were not over-represented in the original anal-  
184 ysis, we performed a cross-validation of our analysis by random sub-sampling.  
185 Specifically, we repeated the analysis 100 times with a random subset of the data  
186 composed of (randomly selected) single networks of each unique animal group in  
187 our database. An average of coefficient estimates across the multiple subsam-  
188 ples was then calculated and compared to the coefficients estimated using the full  
189 dataset.

190 **Evaluating the role of weak ties in driving structural differences in**  
191 **species' social system**

192 The analysis described in the previous section assumes equal importance of all  
193 edges recorded in a social network. To examine the role of weak ties in driving  
194 the structural differences between the three social systems, we removed edges with  
195 weights lower than a specified threshold. Four edge weight thresholds were ex-  
196 amined in detail: 5%, 10%, 15% and 20%. Specifically, all edges with weights  
197 below the specified threshold were removed to obtain thresholded social networks.  
198 For example, to construct a 10% threshold network from an original network with  
199 maximum edge weight  $\omega$ , we removed all edges with weights below  $0.1 \times \omega$ . Next,  
200 the phylogenetically-controlled Bayesian mixed model analysis described in the  
201 previous section was repeated to determine the structural difference between the  
202 thresholded networks of the three social systems. We ran four separate models,  
203 each with one of the four thresholds.

204 **Disease implications of network structure and species' social**  
205 **system**

206 We considered disease costs of the three social systems with synthetic experiments  
207 based on a computational disease model, and followed up with statistical analysis  
208 of the results.

209 **Disease simulations**

210 We performed Monte-Carlo simulations of a discrete-time susceptible-infected-  
211 recovered (SIR) model of infection spread through each network in our database.

212 For disease simulations, we ignored the weights assigned to social interactions  
213 between individuals, because the impact of interaction weight (whether they rep-  
214 resent contact duration, frequency or intensity) on infection spread is generally not  
215 well understood epidemiologically. Transmissibility of the simulated pathogen was  
216 defined as the probability of infection transmission from an infected to susceptible  
217 host during the infectious period of the host. Assuming infection transmission  
218 to be a Poisson process and a constant recovery probability (Grenfell & Dobson,  
219 1995; Kiss, Miller & Simon, 2017), the pathogen transmissibility can be calculated  
220 as  $T = \frac{\beta}{\beta + \gamma}$ , where  $\beta$  and  $\gamma$  is the infection and recovery probability parameter,  
221 respectively (Bansal, Grenfell & Meyers, 2007). The stochastic epidemiological  
222 simulations used in this study are based on a discrete-time, chain binomial, SIR  
223 model (Bailey, 1957). Each disease simulation was initiated by infecting a ran-  
224 domly chosen individual in the social network. At subsequent time steps every  
225 infected individual in the network could either transmit infection to a susceptible  
226 neighbour with probability parameter  $\beta$  or recover with probability  $\gamma$ . The disease  
227 simulations were terminated when there were no remaining infected individuals in  
228 the network. We performed disease simulations with a wide range of transmissibil-  
229 ity values (0.05 to 0.45, with increments of 0.05), by varying infection probability  
230 ( $\beta$ ) and assuming a constant recovery probability ( $\gamma = 0.2$  or average infectious  
231 period of 5 days). In the paper, we focus our discussion on three specific values of  
232 pathogen transmissibility ( $T = 0.05, 0.15,$  and  $0.45$ ) because they correspond to  
233 low, moderate and highly contagious infectious diseases with average basic repro-  
234 duction numbers ( $R_0$ ) of 1.6, 4.6 and 14.0, respectively (Heffernan, Smith & Wahl,  
235 2005). The detailed results of disease simulations over a wider range of pathogen  
236 transmissibility (0.05 – 0.45) are included in the Supporting information.

237 To investigate the effects of recovery probability on the behavior of pathogen  
238 spread, we repeated disease simulations with a similar range of transmissibility  
239 values as before (0.05 to 0.45), but with a longer infectious period (10 days or  
240  $\gamma = 0.1$ ). For each combination of pathogen transmissibility and social network,  
241 500 simulations of disease spread were carried out and summarized using three  
242 measures: (a) epidemic probability, the likelihood of an infectious disease invasion  
243 turning into a large epidemic (outbreaks that infect at least 15% of the population)  
244 (b) epidemic duration, the time to epidemic extinction, and (c) epidemic size, the  
245 average percentage of individuals infected in an epidemic outbreak.

## 246 **Evaluating disease outcomes of network structure and species' social** 247 **system**

248 Three separate linear Gaussian models, one corresponding to each outbreak mea-  
249 sure (epidemic probability, epidemic duration, and epidemic size), were fit to es-  
250 tablish disease costs of network measures associated with species' social system  
251 using using the R package MCMCglmm (Hadfield, 2010). To evaluate the role  
252 of network structure on the probability of large outbreaks, pathogen transmissi-  
253 bility and network measures included in the final model of the previous analysis  
254 were included as predictors (Table1). We repeated the analysis with the species'  
255 social system as predictor to directly estimate the vulnerability of different social  
256 structure towards disease transmission.

257 In all models, the effective number of nodes (i.e., the number of individuals  
258 with degree greater than zero), network density and the size of the largest con-  
259 nected component of the network were also included as controlling predictors. As  
260 before, we controlled for the presence of phylogenetic correlations, group identi-

261 fication, animal species, edge weight type, and sampling scale of networks. As  
262 infectious disease spread over different interaction types represents different trans-  
263 mission routes, we also controlled for pathogen transmission mode by including the  
264 interaction type as a random effect. Minimally informative priors were used for  
265 fixed effects (normal prior) and (co)variance components (inverse Wishart; Had-  
266 field (2010)). We ran three MCMC chains for 100 thousand iterations, with a  
267 thinning interval of 10 after burn-in of 2000, and assessed convergence using the  
268 Gelman-Rubin diagnostic statistic (Gelman & Rubin, 1992) in the *coda* package.  
269 To make posthoc comparisons within the models, we performed pairwise compar-  
270 isons between the three social systems with a Tukey adjustment of  $P$  values, using  
271 the *lsmeans* R package (Lenth, 2016).

## 272 Results

### 273 Unique network structures associated with species' social sys- 274 tem

275 The final model (after removing collinear predictors) consisted of seven global  
276 network measures - degree heterogeneity, degree homophily, average betweenness  
277 centrality, average clustering coefficient, subgroup cohesion, network fragmentation  
278 and network diameter (Fig. 1, Table 1). Out of the five random effects included in  
279 the model (phylogeny, group identification, interaction type, edge type, sampling  
280 scale), phylogeny explained a large portion of the variance (Table S2, Supporting  
281 information), indicating that there is a substantial phylogenetic correlation within  
282 the social systems. Of the three social systems (relatively solitary, gregarious

283 and socially hierarchical), the social networks of relatively solitary species demon-  
284 strated the largest variation in the number of social partners, or degree hetero-  
285 geneity (Table 1). In contrast, socially hierarchical species had the least variation  
286 in number of social partners, and experienced a local social environment that is  
287 not as well inter-connected; this is evident by the low average clustering coefficient  
288 of their social networks as compared to other social systems (average clustering  
289 coefficient, Table 1). In terms of network fragmentation (which was calculated on  
290 the largest connected component of networks), the social networks of gregarious  
291 species were the most subdivided into socially cohesive groups. No statistically  
292 significant differences were observed between the social systems with respect to  
293 other network metrics. Table S3 of Supporting information reports the average  
294 coefficient estimates of all seven global network metrics from the cross-validation  
295 analysis; all estimates were within the 95% credible interval of the effect sizes re-  
296 ported in the full model (Table 1). We also find that the organization of social  
297 networks depends on the sampling scale of social associations, but not on the type  
298 of interactions recorded (including when the interaction types are grouped into  
299 two categories of direct interactions vs. associations, and when the recorded inter-  
300 actions are categorized into ten distinct types mentioned in Fig. 2). For example,  
301 networks measured at a population scale rather than for social groups tended to have  
302 low local connectivity, as measured by the average clustering coefficient, and low  
303 average betweenness centrality (Table S4, Supporting information).

## 304 **Disease costs of network structure and species' social system**

305 Our previous analysis revealed that only a few features of social networks are sig-  
306 nificant in distinguishing the three social systems. Next we ask: Do these key  
307 topological differences mediate differential disease costs of each social system? To  
308 answer this question, we first examined how degree heterogeneity, clustering coef-  
309 ficient and network fragmentation influence epidemic risk and transmission of low,  
310 moderate and highly transmissible pathogens (Fig. 3; see Fig. S2, S4 in Supporting  
311 information for results on an extended range of pathogen transmissibility values  
312 and Fig. S5 for results on disease simulations with extended infectious period).  
313 High variation in individual sociality (i.e., high degree heterogeneity) in social net-  
314 works was predictive of small and short epidemic outbreaks for low transmissible  
315 pathogens. Moderately spreading pathogens in network with high degree hetero-  
316 geneity led to less frequent, shorter epidemics that infected a smaller proportion  
317 of the population (degree heterogeneity, Fig. 3). The presence of cliques in social  
318 networks was associated with prolonged but small outbreaks of low transmissible  
319 pathogens, and higher epidemic risk of moderately transmissible infections (aver-  
320 age clustering coefficient, Fig. 3). Subdivisions of networks into socially cohesive  
321 groups (high fragmentation) was associated with reduced risk of lowly transmissible  
322 infections becoming large epidemics; outbreaks that did reach epidemic proportion  
323 were shorter and infected a lower proportion of the population. Conversely, highly  
324 contagious pathogens caused frequent, large, and prolonged epidemic outbreaks in  
325 networks with high network fragmentation (network fragmentation, Fig. 3).

326 Consequently, socially hierarchical species experienced elevated risk of epidemic  
327 outbreaks of moderately transmissible pathogen due to homogeneous individual



328 connectivity (low degree heterogeneity) and high global connectivity (low net-  
329 work fragmentation) nature of their social networks (epidemic probability, Fig.  
330 4, Fig. S3 and S5 in Supporting information). The highly fragmented networks  
331 of gregarious species were more vulnerable to frequent, large, and prolonged epi-  
332 demic outbreaks of highly transmissible pathogens as compared to other social  
333 systems. Given that degree heterogeneity and network fragmentation is associ-  
334 ated with shorter outbreaks of low transmissible pathogens (Fig. 3, Fig. S3 and  
335 S6 in Supporting information), epidemic duration of less transmissible pathogens  
336 was lowest in gregarious species, followed by relatively solitary species (epidemic  
337 duration, Fig. 4, Fig. S3 and S6 in Supporting information). For moderately  
338 contagious pathogens, highly fragmented networks of gregarious species experi-  
339 enced longer epidemic outbreaks as compared to relatively solitary and socially  
340 hierarchical species.

## 341 **Role of weak ties in distinguishing species' social system, and** 342 **disease implications**

343 When the weakest 5% edges were removed from all weighted networks, the struc-  
344 tural differences between the three social systems were observed mainly in two  
345 network metrics - degree heterogeneity and network fragmentation. Similar to  
346 the empirical networks (Table 1), the 5% thresholded social networks of relatively  
347 solitary species demonstrated the highest variation in number of social partners;  
348 and 5% thresholded networks of gregarious species were more fragmented com-  
349 pared to relatively solitary and socially hierarchical species (Table S5, Supporting  
350 information). When the weakest 10% and 15% edges were removed, the global net-

351 work measures across all social systems were similar to each other, except for one  
352 important difference. Both 10% and 15% thresholded networks of social species  
353 (gregarious and socially hierarchical) demonstrated a statistically significant higher  
354 average betweenness centrality, or higher global connectivity than relatively soli-  
355 tary species (Table S6, S7 and S8, Supporting information).

356 Disease simulations through 20% edge weight thresholded social networks re-  
357 vealed no differences in epidemiological outcomes between the three social systems  
358 for all except low pathogen transmissibility (Fig. S7, Supporting information).  
359 For slow spreading pathogens, networks of relatively solitary species experienced  
360 prolonged epidemic outbreaks as compared to social species.

## 361 Discussion

362 It is becoming increasingly clear that the impact of an infectious disease on a pop-  
363 ulation depends on the organization of infection-spreading interactions between  
364 individuals rather than group size. (Godfrey *et al.*, 2009; Craft, 2015; White,  
365 Forester & Craft, 2015; Sah *et al.*, 2017). Since organization of social network  
366 structure concurrently impacts the transmission of information and infectious dis-  
367 eases, it has critical implications for understanding the evolutionary tradeoffs be-  
368 tween social behavior and disease dynamics. The disease implications of social  
369 network structure can differ depending on the evolutionary trajectory of social  
370 systems. For instance, social complexity can emerge as a result of selective pres-  
371 sures of past infectious diseases, and therefore may have the ability to lower the  
372 risk of transmission of future infectious disease (Hock & Fefferman, 2012). Con-  
373 versely, the patterns of social interactions may not provide protection from disease

374 transmission in species that use alternate defense mechanisms (physiological or  
375 behavioral) to combat disease spread once it is introduced in the population (Cre-  
376 mer, Armitage & Schmid-Hempel, 2007; Stroeymeyt, Casillas-Pérez & Cremer,  
377 2014; Meunier, 2015). In this study, we assessed whether network structure alone  
378 (in absence of physiological or behavioral disease defense mechanisms) can reduce  
379 the risk of infectious disease transmission in different social systems, using com-  
380 parative methods on an extensive database of animal social networks.

381 Our analysis compares global structural features associated with social net-  
382 works of species classified into three social systems: relatively solitary, gregarious  
383 and socially hierarchical. The evidence that we present here suggests that, at the  
384 least, relatively solitary, gregarious, and higher social organizations can be distin-  
385 guished from each other based on *(i)* degree of variation among social partners  
386 (i.e. degree heterogeneity), *(ii)* local connectivity, as indicated by the presence of  
387 cliques within the social networks (i.e. average clustering coefficient), and *(iii)* the  
388 extent to which the social network is divided into cohesive social groups (i.e., net-  
389 work fragmentation). Specifically, we find that social networks of relatively solitary  
390 species tend to demonstrate the highest degree heterogeneity, that social networks  
391 of gregarious species tend to be the most fragmented, and that socially hierar-  
392 chical species are least clustered in their interactions. The structural differences  
393 between the social systems were detected after controlling for systematic biases  
394 in the data-collection (that might generate non-biological differences between the  
395 social structures). This suggests that the underlying differences in social network  
396 structures associated with each social system are biologically significant.

397 Social species are typically assumed to have a skewed degree distribution (for  
398 e.g. bottlenose dolphins Lusseau *et al.* (2003), wire-tailed manakins Ryder *et al.*

399 (2008)), which implies that a small proportion of individuals have a large num-  
400 ber of social partners. Our results, however, show that degree heterogeneity in  
401 relatively solitary species can be much higher than social species. Large variation  
402 in the number of social connections in relatively solitary species may simply arise  
403 due to a high variation in spatial behavior as compared to social species (Pinter-  
404 Wollman, 2015; Sah *et al.*, 2016). A homogeneous degree distribution in socially  
405 hierarchical species, such as ants and savanna baboons, could allow for efficient  
406 and equitable information transfer to all individuals (Blonder & Dornhaus, 2011;  
407 Cantor & Whitehead, 2013). Low average clustering coefficient, as observed in so-  
408 cially hierarchical species, indicates that an individual's local social network is not  
409 tightly interconnected (i.e., individual's contacts do not form a tight clique), and  
410 is known to increase network resilience and stability in response to perturbations  
411 such as the removal or death of individuals (Flack *et al.*, 2006; Krause *et al.*, 2014).

412 Our results also show that social networks of gregarious species are the most  
413 subdivided (but not disconnected) into cohesive social subgroups. The presence of  
414 many but small, socially cohesive subgroups within social networks of gregarious  
415 species can be explained based on the behavioural tendency to switch affiliative  
416 partners; as a result, individuals form consistent social bonds with a only small  
417 subset of individuals (Rubenstein *et al.*, 2015). Many gregarious species also form  
418 groups based on sex or age class, kinship and functional roles (Kanngiesser *et al.*,  
419 2011) or due to high spatial or temporal variability in resources (Couzin, 2006;  
420 Couzin & Laidre, 2009; Sueur *et al.*, 2011). Previous theoretical models have  
421 shown that modular subdivisions promote behavioural diversity and cooperation  
422 (Whitehead & Lusseau, 2012; Gianetto & Heydari, 2015). Gregarious species may  
423 therefore limit the size of their social subgroups to maximize benefits of coopera-

424 tion, making their social networks subdivided (Marcoux & Lusseau, 2013).

425 Our results show that the observed structural differences between the three so-  
426 cial systems are primarily driven by the presence weak ties in their social networks.  
427 The reason why filtering out weak weighted edges removes most structural differ-  
428 ences between social systems lies in their organization of weak ties. Individuals  
429 of social species disproportionately allocate effort among their social connections  
430 in order to maintain overall group connectivity (Fig. S1, Supporting information)  
431 and are also known to have high social fluidity (Colman & Bansal, 2017). Re-  
432 moving weak ties from networks of social species therefore increases variation in  
433 individual connectivity (degree heterogeneity), with a relatively minor decrease  
434 in their global connectivity (average betweenness centrality). Consequently, the  
435 global connectivity of social species in 10%-15% thresholded networks is signifi-  
436 cantly higher than relatively solitary species.

437 Previous studies have typically focused on group size as the key parameter  
438 impacting disease transmission and group living costs. However, the expectation  
439 of higher disease costs of group living has yielded mixed results (Arnold & Anja,  
440 1993; Rifkin, Nunn & Garamszegi, 2012; Patterson & Ruckstuhl, 2013), which can  
441 be explained in part by the presence of group-level behavioural (Meunier, 2015;  
442 Schaller *et al.*, 2015) and physiological defense (Habig, Archie & Habig, 2015)  
443 against infection spread, as well as the presence of chronic social stress (Kappeler  
444 *et al.*, 2015; Nunn *et al.*, 2015). While group size might be easy parameter to  
445 measure, it does not capture the complex spatio-temporal dynamics of most an-  
446 imal societies. By performing disease simulations over empirical networks with  
447 different interaction types, we consider a range of infectious diseases with differ-  
448 ent transmission routes, including those that spread by direct contact, and those

449 that spread by asynchronous contact between individuals in a population. Our  
450 analysis shows that the organization of social patterns may not provide general  
451 protection against pathogens of a range of transmission potential. We note that  
452 our results on epidemic size and duration are specific to pathogens that follow  
453 SIR (susceptible-infected-recovered) infection dynamics. The outcome of epidemic  
454 probability, however, is expected to be similar across different models of infectious  
455 disease spread (such as infections that provide temporary immunity or chronic  
456 infections).

457 We find that socially hierarchical species experience longer outbreaks of low  
458 transmissibility infections and frequent epidemics of moderately contagious infec-  
459 tions because of low variation in individual and local connectivity (i.e., degree  
460 heterogeneity and average clustering coefficient) as compared to other social sys-  
461 tems. Networks with low degree heterogeneity are known to experience steady  
462 protracted outbreaks, in contrast to explosive rapid outbreaks fueled by super-  
463 spreaders in high degree heterogeneity networks (Meyers *et al.*, 2005; Kiss, Green  
464 & Kao, 2006; Bansal, Grenfell & Meyers, 2007). High average clustering coefficient  
465 is also believed to create redundant paths between individuals making it harder for  
466 slow spreading infections to encounter new susceptible individuals and percolate  
467 throughout the network, prolonging infection spread (Newman, 2003).

468 In our disease simulations, highly fragmented social networks of gregarious  
469 species experienced frequent epidemics of highly contagious infections, and longer  
470 epidemics of moderately to highly transmissible pathogens. Our recent work has  
471 shown that infection spread in highly fragmented networks gets localized within  
472 socially cohesive subgroups (structural trapping), which enhances local transmis-  
473 sion but causes structural delay of global infection spread (Sah *et al.*, 2017). In

474 addition, our results suggest that highly transmissible pathogens are able to avoid  
475 stochastic extinction in fragmented networks by reaching "bridge" nodes, but ex-  
476 perience delay in transmission due to the presence of structural bottlenecks.

477 As this study involved comparisons of social networks across a broad range  
478 of taxonomic groups and data sampling methods, we made a number of assump-  
479 tions that could shape the results. First, because the impact of edge weights on  
480 disease transmission can be context-dependent, depending on the type of inter-  
481 action, transmission mode of pathogen, and the relative time scale of network  
482 collection and pathogen spread, we have chosen to not include edge weights while  
483 performing our computational disease experiments. Future meta-analytic studies  
484 can leverage a growing number of transmission studies to explicitly incorporate  
485 the role of contact intensity on disease transmission (Aiello *et al.*, 2016; Manlove  
486 *et al.*, 2017). Second, we assume that social contacts remain unaltered after an  
487 infection is introduced in population. Presence of infection, however, can alter  
488 the social connectivity of hosts (Croft *et al.*, 2011; Lopes, Block & König, 2016).  
489 Future species specific studies can take advantage of host specific experimental  
490 manipulations, where possible, to gain in-depth insight towards host behavior -  
491 infection feedback (Ezenwa *et al.*, 2016; Silk *et al.*, 2017a). Finally, in our network  
492 database there were some systematic differences in data-collection methodologies  
493 across social systems. Specifically, all data for relative solitary species were col-  
494 lected by sampling individuals over a specified spatial range, because definition of  
495 social groups for these species can be vague. As observations of direct interactions  
496 in relatively solitary species are rare, all networks of relatively solitary species in  
497 our database were based on direct or indirect spatial associations. Although the  
498 meta-analysis described in this study controlled for such biases in data-collection,

499 the results should be interpreted as a conceptual understanding about the differ-  
500 ences between the social systems in terms of empirical networks that have been  
501 published in the literature, and not as a general prediction about the differences  
502 in social systems.

503 Overall, our results suggests that the organization of social networks in gregar-  
504 ious species are more efficient in preventing outbreaks of moderately contagious  
505 pathogens than socially hierarchical species. Conversely, networks of socially hier-  
506 archical species experience fewer outbreaks of fast spreading infectious diseases as  
507 compared to gregarious species. The question of why this is so warrants detailed  
508 future investigations of the eco-evolutionary trajectory of social connectivity in the  
509 two social systems. It is likely that the organization of social networks in socially  
510 hierarchical species may have evolved to prevent outbreaks of highly transmissible  
511 pathogens, while relying on alternate group-level disease defense mechanisms (in-  
512 cluding sanitary behaviors, allogrooming, and the use of antimicrobials) to prevent  
513 outbreaks of low to moderate transmissibility infections. Since the social networks  
514 included in the meta-analysis were selected regardless of the presence of infectious  
515 diseases in the populations, the organization of network structure could also reflect  
516 the selection pressure of past infections, presence of other ecological/evolutionary  
517 drivers (Pinter-Wollman *et al.*, 2013), or conflicting selection pressures posed by  
518 the effort to maximize transmission of information.

## 519 **Challenges and opportunities**

520 The sociality of animal species has been traditionally classified based on qualitative  
521 phenotypes and life history traits, and the classification typically differs between



522 taxonomic groups. While this categorization scheme is convenient, it does not  
523 capture the continuum of social behaviour. As a step forward, recent studies have  
524 proposed quantitative indices of sociality (Silk, Altmann & Alberts, 2006; Aviles  
525 & Harwood, 2012). The results of our study support the potential use of network  
526 structure as a means of quantifying social complexity across taxonomic bound-  
527 aries. Similar predictive meta-analyses can also be used to identify species that  
528 are outliers in the current sociality classification system based on the organization  
529 of their social structure.

530 However, we need to overcome several challenges before robust comparative  
531 analysis can be performed on social networks across broad taxonomic groups to  
532 address such issues. First, comparing network structure across taxonomic groups  
533 where data is aggregated over different spatio-temporal scales is challenging. Ag-  
534 gregating interactions over small time-periods may omit important transient inter-  
535 actions, whereas aggregating data over long time-periods may lead to a saturated  
536 network where distinguishing social organization may be difficult. Spatial con-  
537 straints and environmental heterogeneity can also impose a considerable influence  
538 on the social network structure (Davis *et al.*, 2015; Leu *et al.*, 2016). Additionally,  
539 the consideration of relative time scale of animal interaction and infectious period  
540 of pathogen is critical in making accurate predictions of disease spread. Future  
541 comparative studies should therefore consider standardizing data over temporal  
542 and spatial scales.

543 The second challenge lies in effectively controlling for inherent biases in data  
544 collection methodologies across taxonomic groups. As direct observation of inter-  
545 actions is difficult in relatively solitary species, social networks are usually con-  
546 structed based on direct or indirect spatial associations (rather than interactions)

547 between individuals in a population (rather than a local group). Network size  
548 correlates to sampling intensity in many cases, and is therefore a poor proxy to  
549 group size. Social network studies of relatively solitary species are also relatively  
550 sparse compared to social species.

551 The third challenge for comparative studies of animal social networks is uti-  
552 lizing data-sources published in inconsistent formats. To facilitate in-depth meta-  
553 analyses of network data, we encourage researchers to accompany animal network  
554 datasets with the following details: data sampling method, location of the data  
555 collection, type of population monitored (captive, semi-captive, free-ranging), edge  
556 definition, edge weighting criteria, node attributes (such as demography), tempo-  
557 ral resolution of data, temporal and spatial aggregation of the data, proportion of  
558 animals sampled in the area, and population density. When exact measurements  
559 of these data attributes are difficult, using reasonable approximations or proxies  
560 would be more useful than no information.

## 561 **Conclusions**

562 In summary, our study broadens the scope of network analysis from being just  
563 species-specific to a meta-analytic approach, and provides new insights towards  
564 how the organization of interaction patterns can mediate disease costs of sociality.  
565 We note that there is enormous potential of adopting a comparative approach to  
566 study the commonalities and differences in social networks across a wide range  
567 of taxonomic groups and social systems. Future studies can use this approach to  
568 quantitatively test several evolutionary and ecological hypotheses, including ones  
569 on the tradeoffs of group living, the contributions of social complexity to intelli-

570 gence, the propagation of social information, and social resilience to population  
571 stressors.

## 572 Acknowledgements

573 We thank José David Méndez for his assistance in organizing data. We are grateful  
574 for the constructive and insightful reviews provided by Matthew Silk, Damien  
575 Farine and two anonymous reviewers; as well as for the feedback provided by  
576 Stephan Leu on a previous version of this manuscript. This work was supported  
577 by the National Science Foundation Ecology and Evolution of Infectious Diseases  
578 grant 1216054.

## 579 Data accessibility

580 The data for all animal social network measures used in the study, and references  
581 where the actual network can be accessed, is available through the Bansal Lab  
582 Dataverse at (link).

## 583 References

584 Aiello, C.M., Nusslear, K.E., Esque, T.C., Emblidge, P.G., Sah, P., Bansal, S.  
585 & Hudson, P.J. (2016) Host contact and shedding patterns clarify variation in  
586 pathogen exposure and transmission in threatened tortoise *Gopherus agassizii*:  
587 implications for disease modeling and management. *Journal of Animal Ecology*,  
588 **85**, 829–842. ISSN 00218790.

- 589 Altizer, S., Nunn, C.C.L., Thrall, P.P.H., Gittleman, J.L.J., Antonovics, J., Cun-  
590 ningham, A.A.a., Dobson, A.A.P.A., Ezenwa, V., Jones, K.K.E.K., Pedersen,  
591 A.A.B., Poss, M. & Pulliam, J.J.R.J. (2003) Social organization and parasite  
592 risk in mammals: Integrating theory and empirical studies. *Annual Review of*  
593 *Ecology, Evolution, and Systematics*, **34**, 517–547.
- 594 Anderson, R.M., May, R.M. & Anderson, B. (1992) *Infectious diseases of humans:*  
595 *dynamics and control*, vol. 28. Wiley Online Library.
- 596 Arnold, W. & Anja, V.L. (1993) Ectoparasite loads decrease the fitness of alpine  
597 marmots (*Marmota marmota*) but are not a cost of sociality. *Behavioral Ecology*,  
598 **4**, 36–39.
- 599 Aureli, F., Schaffner, C.M., Boesch, C., Bearder, S.K., Call, J., Chapman, C.A.,  
600 Connor, R., Fiore, A.D., Dunbar, R.I.M., Henzi, S.P., Holekamp, K., Korstjens,  
601 A.H., Layton, R., Lee, P., Lehmann, J., Manson, J.H., Ramos-Fernandez, G.,  
602 Strier, K.B. & Schaik, C.P.v. (2008) Fission-Fusion Dynamics. *Current Anthro-*  
603 *pology*, **49**, 627–654.
- 604 Aviles, L. & Harwood, G. (2012) A Quantitative Index of Sociality and Its Ap-  
605 plication to Group-Living Spiders and Other Social Organisms. *Ethology*, **118**,  
606 1219–1229.
- 607 Bailey, N.T. (1957) The mathematical theory of epidemics.
- 608 Bansal, S., Grenfell, B.T. & Meyers, L.A. (2007) When individual behaviour mat-  
609 ters: homogeneous and network models in epidemiology. *Journal of the Royal*  
610 *Society, Interface / the Royal Society*, **4**, 879–91. ISSN 1742-5689.

- 611 Blondel, V.D., Guillaume, J.L., Lambiotte, R. & Lefebvre, E. (2008) Fast unfolding  
612 of communities in large networks. *Journal of Statistical Mechanics: Theory and*  
613 *Experiment*, **2008**, P10008.
- 614 Blonder, B. & Dornhaus, A. (2011) Time-ordered networks reveal limitations to  
615 information flow in ant colonies. *PloS one*, **6**, e20298. ISSN 1932-6203.
- 616 Cantor, M. & Whitehead, H. (2013) The interplay between social networks and  
617 culture : theoretically and among whales and dolphins The interplay between  
618 social networks and culture : theoretically and among whales and dolphins.  
619 *Philosophical transactions of the Royal Society of London. Series B, Biological*  
620 *sciences*, **368**, 1–10. ISSN 0962-8436, 1471-2970.
- 621 Colman, E. & Bansal, S. (2017) Social fluidity mobilizes infectious disease in human  
622 and animal populations. *bioRxiv*.
- 623 Couzin, I.D. & Laidre, M.E. (2009) Fission-fusion populations. *Current Biology*,  
624 **19**, 633–635. ISSN 09609822.
- 625 Couzin, I. (2006) Behavioral ecology: social organization in fission–fusion societies.  
626 *Current Biology*, **16**, 169–171. ISSN 0960-9822.  
627 URL <http://www.sciencedirect.com/science/article/pii/S0960982206011924>
- 628 Craft, M.E. (2015) Infectious disease transmission and contact networks in wildlife  
629 and livestock. *Philosophical Transactions of the Royal Society of London. Series*  
630 *B, Biological Sciences*, **370**, 1–12. ISSN 1471-2970.
- 631 Cremer, S., Armitage, S.a.O. & Schmid-Hempel, P. (2007) Social immunity. *Cur-*  
632 *rent biology : CB*, **17**, R693–702.

- 633 Croft, D.P., Edenbrow, M., Darden, S.K., Ramnarine, I.W., Oosterhout, C.v.  
634 & Cable, J. (2011) Effect of gyrodactylid ectoparasites on host behaviour and  
635 social network structure in guppies *Poecilia reticulata*. *Behavioral Ecology and*  
636 *Sociobiology*, **65**, 23–35.
- 637 Croft, D.P., James, R. & Krause, J. (2008) *Exploring Animal Social Networks*.  
638 Princeton University Press.
- 639 Davis, S., Abbasi, B., Shah, S., Telfer, S. & Begon, M. (2015) Spatial analyses of  
640 wildlife contact networks. *Journal of the Royal Society, Interface*, **12**.
- 641 Ezenwa, V.O., Ghai, R.R., McKay, A.F. & Williams, A.E. (2016) Group living  
642 and pathogen infection revisited. *Current Opinion in Behavioral Sciences*, **12**,  
643 66–72. ISSN 23521546.
- 644 Farine, D.R. & Whitehead, H. (2015) Constructing, conducting, and interpreting  
645 animal social network analysis. *The Journal of animal ecology*, pp. 1144–1163.
- 646 Faust, K. (2006) Comparing Social Networks : Size , Density , and Local Structure.  
647 *Metodološki zvezki*, **3**, 185–216.
- 648 Faust, K. & Skvoretz, J. (2002) Comparing Networks across Space and Time, Size  
649 and Species. *Sociological Methodology*, **32**, 267–299. ISSN 0081-1750.
- 650 Flack, J.C., Girvan, M., de Waal, F.B.M. & Krakauer, D.C. (2006) Policing sta-  
651 bilizes construction of social niches in primates. *Nature*, **439**, 426–429. ISSN  
652 0028-0836.
- 653 Gelman, A. & Rubin, D.B. (1992) Inference from iterative simulation using mul-  
654 tiple sequences. *Statistical science*, pp. 457–472.

- 655 Gelman, A. (2006) Prior distributions for variance parameters in hierarchical mod-  
656 els (Comment on Article by Browne and Draper). *Bayesian Analysis*, **1**, 515–534.
- 657 Gianetto, D.A. & Heydari, B. (2015) Network Modularity is essential for evolution  
658 of cooperation under uncertainty. *Scientific Reports*, **5**, 9340.
- 659 Godfrey, S.S., Bull, C.M., James, R. & Murray, K. (2009) Network structure and  
660 parasite transmission in a group living lizard, the gidgee skink, *Egernia stokesii*.  
661 *Behavioral Ecology and Sociobiology*, **63**, 1045–1056.
- 662 Grenfell, B.T. & Dobson, A.P. (1995) *Ecology of infectious diseases in natural*  
663 *populations*, vol. 7. Cambridge University Press.
- 664 Habig, B., Archie, E.A. & Habig, B. (2015) Social status, immune response and  
665 parasitism in males: a meta-analysis. *Philosophical Transactions of the Royal*  
666 *Society B*, **370**, 20140109. ISSN 1471-2970.
- 667 Hadfield, J. (2014) MCMCglmm course notes.
- 668 Hadfield, J.D. (2010) MCMC methods for multi-response generalized linear mixed  
669 models: The MCMCglmm R package. *Journal of Statistical Software*, **33**, 1–22.
- 670 Heffernan, J., Smith, R. & Wahl, L. (2005) Perspectives on the basic reproductive  
671 ratio. *Journal of The Royal Society Interface*, **2**, 281–293. ISSN 1742-5689.
- 672 Hock, K. & Fefferman, N.H. (2012) Social organization patterns can lower disease  
673 risk without associated disease avoidance or immunity. *Ecological Complexity*,  
674 **12**, 34–42.

- 675 Kanngiesser, P., Sueur, C., Riedl, K., Grossmann, J. & Call, J. (2011) Grooming  
676 network cohesion and the role of individuals in a captive chimpanzee group.  
677 *American Journal of Primatology*, **73**, 758–767.
- 678 Kappeler, P.M. & van Schaik, C.P. (2002) Evolution of Primate Social Systems.  
679 *International Journal of Primatology*, **23**, 707–740. ISSN 1573-8604.
- 680 Kappeler, P.M., Cremer, S., Nunn, C.L. & Kappeler, P.M. (2015) Sociality and  
681 health: impacts of sociality on disease susceptibility and transmission in animal  
682 and human societies. *Philosophical transactions of the Royal Society of London.*  
683 *Series B, Biological sciences*, **370**, 20140116. ISSN 0962-8436.
- 684 Keeling, M. (2005) The implications of network structure for epidemic dynamics.  
685 *Theoretical population biology*, **67**, 1–8. ISSN 0040-5809.
- 686 Kiss, I.Z., Green, D.M. & Kao, R.R. (2006) Infectious disease control using con-  
687 tact tracing in random and scale-free networks. *Journal of the Royal Society,*  
688 *Interface / the Royal Society*, **3**, 55–62.
- 689 Kiss, I.Z., Miller, J.C. & Simon, P.L. (2017) *Mathematics of epidemics on networks:*  
690 *from exact to approximate models*, vol. 46. Springer.
- 691 Krause, J., Croft, D.P. & James, R. (2007) Social network theory in the behavioural  
692 sciences: Potential applications. *Behavioral Ecology and Sociobiology*, **62**, 15–27.  
693 ISSN 03405443.
- 694 Krause, J., James, R., Franks, D.W. & Croft, D.P., eds. (2014) *Animal social*  
695 *networks*. Oxford University Press, USA.



- 696 Lenth, R.V. (2016) Least-squares means: the R package lsmeans. *Journal of*  
697 *Statistical Software*, **69**, 1–33.
- 698 Leu, S.T., Farine, D.R., Wey, T.W., Sih, A. & Bull, C.M. (2016) Environment  
699 modulates population social structure: experimental evidence from replicated  
700 social networks of wild lizards. *Animal Behaviour*, **111**, 23–31.
- 701 Leu, S.T., Kappeler, P.M. & Bull, C.M. (2010) Refuge sharing network predicts  
702 ectoparasite load in a lizard. *Behavioral Ecology and Sociobiology*, **64**, 1495–  
703 1503.
- 704 Loehle, C. (1995) Social Barriers to Pathogen Transmission in Wild Animal Popu-  
705 lations. *Ecology*, **76**, 326–335.
- 706 Lopes, P.C., Block, P. & König, B. (2016) Infection-induced behavioural changes  
707 reduce connectivity and the potential for disease spread in wild mice contact  
708 networks. *Scientific Reports*, **6**, 31790. ISSN 2045-2322.
- 709 Lusseau, D., Schneider, K., Boisseau, O.O.J., Haase, P., Slooten, E. & Dawson,  
710 S.S.M. (2003) The bottlenose dolphin community of Doubtful Sound features a  
711 large proportion of long-lasting associations. *Behavioral Ecology and Sociobiol-*  
712 *ogy*, **54**, 396–405.
- 713 Manlove, K.R., Cassirer, E.F., Plowright, R.K., Cross, P.C. & Hudson, P.J. (2017)  
714 Contact and contagion: Probability of transmission given contact varies with  
715 demographic state in bighorn sheep. *Journal of Animal Ecology*, **86**, 908–920.  
716 ISSN 13652656.

- 717 Marcoux, M. & Lusseau, D. (2013) Network modularity promotes cooperation.  
718 *Journal of Theoretical Biology*, **324**, 103–108.
- 719 Meunier, J. (2015) Social immunity and the evolution of group living in insects.  
720 *Philosophical Transactions B of the Royal Society*, **370**, 20140102.
- 721 Meyers, L.A., Pourbohloul, B., Newman, M.E.J., Skowronski, D.M. & Brunham,  
722 R.C. (2005) Network theory and SARS: predicting outbreak diversity. *Journal*  
723 *of theoretical biology*, **232**, 71–81.
- 724 Newman, M. (2003) Properties of highly clustered networks. *Physical Review E*,  
725 **68**, 26121.
- 726 Nunn, C.L., Craft, M.E., Gillespie, T.R., Schaller, M., Kappeler, P.M. & Nunn,  
727 C.L. (2015) The sociality – health – fitness nexus: synthesis, conclusions and  
728 future directions. *Philosophical Transactions of the Royal Society B*, **370**,  
729 20140115. ISSN 1471-2970.
- 730 Otterstatter, M.C. & Thomson, J.D. (2007) Contact networks and transmission of  
731 an intestinal pathogen in bumble bee (*Bombus impatiens*) colonies. *Oecologia*,  
732 **154**, 411–21.
- 733 Patterson, J.E.H. & Ruckstuhl, K.E. (2013) Parasite infection and host group size:  
734 a meta-analytical review. *Parasitology*, pp. 1–11.
- 735 Pinter-Wollman, N. (2015) Persistent variation in spatial behavior affects the struc-  
736 ture and function of interaction networks. *Current Zoology*, **61**, 98–106.
- 737 Pinter-Wollman, N., Hobson, E.A., Smith, J.E., Edelman, A.J., Shizuka, D.,  
738 de Silva, S., Waters, J.S., Prager, S.D., Sasaki, T., Wittemyer, G., Fewell, J.

- 739 & McDonald, D.B. (2013) The dynamics of animal social networks: analytical,  
740 conceptual, and theoretical advances. *Behavioral Ecology*, **25**, 242–255. ISSN  
741 1045-2249.
- 742 Plummer, M., Best, N., Cowles, K. & Vines, K. (2006) CODA: Convergence diag-  
743 nosis and output analysis for MCMC. *R news*, **6**, 7–11.
- 744 Prange, S., Gehrt, S.D., Hauver, S. & Voigt, C.C. (2011) Frequency and duration  
745 of contacts between free-ranging raccoons: uncovering a hidden social system.  
746 *Journal of Mammalogy*, **92**, 1331–1342.
- 747 Rifkin, J.L., Nunn, C.L. & Garamszegi, L.Z. (2012) Do Animals Living in Larger  
748 Groups Experience Greater Parasitism? A Meta-Analysis. *The American Nat-  
749 uralist*, **180**, 70–82.
- 750 Rubenstein, D.I., Sundaresan, S.R., Fischhoff, I.R., Tantipathananandh, C. &  
751 Berger-wolf, T.Y. (2015) Similar but Different : Dynamic Social Network Anal-  
752 ysis Highlights Fundamental Differences between the Fission-Fusion Societies of  
753 Two Equid Species , the Onager and Grevy ' s Zebra. *PLoS ONE*, **10**, 1–21.
- 754 Ryder, T.B., McDonald, D.B., Blake, J.G., Parker, P.G. & Loiselle, B.A. (2008)  
755 Social networks in the lek-mating wire-tailed manakin (*Pipra filicauda*). *Pro-  
756 ceedings of the Royal Society B-Biological Sciences*, **275**, 1367–1374.
- 757 Sah, P., Leu, S.T., Cross, P.C., Hudson, P.J. & Bansal, S. (2017) Unraveling  
758 the disease consequences and mechanisms of modular structure in animal social  
759 networks. *Proceedings of the National Academy of Sciences of the United States  
760 of America*, **114**, 4165–4170. ISSN 1091-6490.

- 761 Sah, P., Nussear, K.E., Esque, T.C., Aiello, C.M., Hudson, P.J. & Bansal, S. (2016)  
762 Inferring social structure and its drivers from refuge use in the desert tortoise,  
763 a relatively solitary species. *Behavioral Ecology and Sociobiology*, pp. 1–13.
- 764 Sah, P., Singh, L.O., Clauset, A. & Bansal, S. (2014) Exploring community struc-  
765 ture in biological networks with random graphs. *BMC bioinformatics*, **15**, 220.
- 766 Schaller, M., Murray, D.R., Bangerter, A. & Schaller, M. (2015) Implications  
767 of the behavioural immune system for social behaviour and human health in  
768 the modern world. *Philosophical Transactions of the Royal Society B*, **370**,  
769 20140105. ISSN 1471-2970.
- 770 Schielzeth, H. (2010) Simple means to improve the interpretability of regression  
771 coefficients. *Methods in Ecology and Evolution*, **1**, 103–113.
- 772 Silk, J., Cheney, D. & Seyfarth, R. (2013) A practical guide to the study of social  
773 relationships. *Evolutionary Anthropology*, **22**, 213–225.
- 774 Silk, J.B., Altmann, J. & Alberts, S.C. (2006) Social relationships among adult  
775 female baboons (*papio cynocephalus*) I. Variation in the strength of social bonds.  
776 *Behavioral Ecology and Sociobiology*, **61**, 183–195.
- 777 Silk, M.J., Croft, D.P., Delahay, R.J., Hodgson, D.J., Boots, M., Weber, N. &  
778 McDonald, R.A. (2017a) Using Social Network Measures in Wildlife Disease  
779 Ecology, Epidemiology, and Management. *BioScience*, **67**, 245–257. ISSN 0006-  
780 3568.
- 781 Silk, M.J., Croft, D.P., Delahay, R.J., Hodgson, D.J., Weber, N., Boots, M. &

- 782 McDonald, R.A. (2017b) The application of statistical network models in disease  
783 research. *Methods in Ecology and Evolution*. ISSN 2041210X.
- 784 Silk, M.J., Croft, D.P., Tregenza, T. & Bearhop, S. (2014) The importance of fis-  
785 sion – fusion social group dynamics in birds. *Ibis*, **156**, 701–715. ISSN 00191019.
- 786 Slater, P.J.B. & Halliday, T.R., eds. (1994) *Behavior and Evolution*. Cambridge  
787 University Press, USA.
- 788 Stroeymeyt, N., Casillas-Pérez, B. & Cremer, S. (2014) Organisational immunity  
789 in social insects. *Current Opinion in Insect Science*, **5**, 1–15. ISSN 22145745.
- 790 Sueur, C., King, A.J., Conradt, L., Kerth, G., Lusseau, D., Mettke-Hofmann,  
791 C., Schaffner, C.M., Williams, L., Zinner, D. & Aureli, F. (2011) Collective  
792 decision-making and fission-fusion dynamics: A conceptual framework. *Oikos*,  
793 **120**, 1608–1617. ISSN 00301299.
- 794 VanderWaal, K.L. & Ezenwa, V.O. (2016) Heterogeneity in pathogen transmission:  
795 mechanisms and methodology. *Functional Ecology*, pp. n/a–n/a. ISSN 02698463.
- 796 White, L.A., Forester, J.D. & Craft, M.E. (2015) Using contact networks to ex-  
797 plore mechanisms of parasite transmission in wildlife. *Biological Reviews*. ISSN  
798 14647931.
- 799 Whitehead, H. & Lusseau, D. (2012) Animal social networks as substrate for cul-  
800 tural behavioural diversity. *Journal of Theoretical Biology*, **294**, 19–28.

## 801 **Table captions**

802 **Table 1.** Effect size estimates of the Bayesian generalized linear mixed models  
803 examining the characteristics of social network structure among the three social  
804 systems: relatively solitary, gregarious and socially hierarchical. Shown are the  
805 posterior means of the expected change in log-odds of being in focal social system  
806 (column headers), as compared to the base social system (row headers), with  
807 one-unit increase in the network measure. The 95% credible intervals (i.e., the  
808 coefficients have a posterior probability of 0.95 to lie within these intervals) are  
809 included in brackets. Significant terms with  $pMCMC < 0.05$  are indicated in bold,  
810 where  $pMCMC$  is the proportion of MCMC samples that cross zero.

## 811 Fig. captions

812 **Fig. 1.** A stylized illustration of the global network measures used (in the final  
813 model) to identify the structural differences in the social networks among different  
814 social systems. (A) Degree heterogeneity, measured as the coefficient of variation  
815 (CV) in the frequency distribution of the number of social partners (known as the  
816 *degree distribution*). Shown is the degree distribution of a homogeneous network  
817 ( $CV \ll 1$ ), and an exponential degree distribution of a network with large varia-  
818 tion in individual degrees ( $CV = 1$ ). (B) Degree homophily ( $\rho$ ), or the tendency of  
819 social partners to have a similar degree. Shown is an example of a disassortative  
820 network, wherein high degree individuals tend to associate with low degree individ-  
821 uals ( $\rho < 0$ ), and assortative degree networks, where high degree individuals tend  
822 to form social bonds with each other ( $\rho > 0$ ). (C) Average betweenness centrality,  
823 that measures the tendency of nodes to occupy central position within the social  
824 network. Shown is an example of a network with low average betweenness central-  
825 ity and a network with high average betweenness centrality. Node colors represent  
826 the betweenness centrality values - nodes with darker colors occupy more central  
827 positions within the network. (D) Subgroup cohesion measures the tendency of  
828 individuals to interact with members of own subgroups (modules). The network to  
829 the left has three low cohesive subgroups, while the network to the right has highly  
830 cohesive subgroups where most of the interactions occur within (rather than be-  
831 tween) subgroups. (E) Network fragmentation, measured as the log-number of the  
832 subgroups (modules) present within the largest connected component of a social  
833 network. Shown is an example of low (left) and highly (right) fragmented network.  
834 (F) The average clustering coefficient measures the average fraction of all possible

835 triangles through nodes that exist in the network, and indicates the propensity of  
836 social partners of individuals to interact with each other. (G) Network diameter is  
837 the longest of all shortest paths between pairs of nodes in a network. Shown is an  
838 example of a network with low network diameter (longest of shortest paths = 3)  
839 and a similar network with network diameter of 5, indicated by red coloured edges.  
840

841 **Fig. 2.** Phylogenetic distribution of animal species represented in the social net-  
842 work dataset used in this study. Numbers next to the inner ring denote the  
843 total networks available for the particular species. The inner and the middle  
844 ring is color coded according to the taxonomic class and the social system of the  
845 species. The colors in the outer ring indicates the type of interaction represented  
846 in the network, and whether the interactions were coded as (direct) interactions  
847 or association in our analyses (in brackets). The tree was constructed in the In-  
848 teractive Tree Of Life (<http://itol.embl.de/>) from the NCBI taxonomy database  
849 (<http://www.ncbi.nlm.nih.gov/Taxonomy/>).

850  
851 **Fig. 3.** Role of network structures in influencing disease transmission summarized  
852 as epidemic probability (likelihood of large outbreaks infecting at least 15% of indi-  
853 viduals in the network), average epidemic duration (time to epidemic extinction),  
854 and average epidemic size (percent of individuals infected in the social network),  
855 for low ( $=0.05$ ), moderate ( $=0.15$ ) and highly ( $=0.45$ ) transmissible pathogens.  
856 The average infectious period of the simulated disease is 5 days ( $\gamma=0.2$ ). The  
857 three global network measures shown are the ones that were found to differ among  
858 the three social systems (Table 1). DH, degree heterogeneity; CC, average clus-  
859 tering coefficient; NF, network fragmentation. Error bars represent 95% credible



860 intervals. Credible intervals that do not include zero suggest significant association  
861 with disease transmission (red = significant effect, black = effect not significant)

862

863 **Fig. 4.** Disease costs of social systems due to social network structure. Disease  
864 cost has been quantified in terms of epidemic probability, average epidemic du-  
865 ration and average epidemic size for low ( $=0.05$ ), moderate ( $=0.15$ ) and highly  
866 ( $=0.45$ ) transmissible pathogens. The average infectious period of the simulated  
867 disease is 5 days ( $\gamma=0.2$ ). Error bars represent standard errors, and different let-  
868 ters above the bars denote a significant difference between the means ( $P < 0.05$ )

869

Table 1:

| Degree heterogeneity           | Focal                 | Relatively solitary | Gregarious                  | Socially hierarchical        |
|--------------------------------|-----------------------|---------------------|-----------------------------|------------------------------|
|                                | Base                  |                     |                             |                              |
|                                | Relatively solitary   |                     | <b>-3.96 [-7.57, -0.33]</b> | <b>-9.46 [-15.21, -3.87]</b> |
|                                | Gregarious            |                     |                             | <b>-6.39 [-11.67, -1.34]</b> |
|                                | Socially hierarchical |                     |                             |                              |
| Degree homophily               | Focal                 | Relatively solitary | Gregarious                  | Socially hierarchical        |
|                                | Base                  |                     |                             |                              |
|                                | Relatively solitary   |                     | -0.18 [-1.66, 1.17]         | -1.69 [-3.80, 0.25]          |
|                                | Gregarious            |                     |                             | -1.64 [-3.25, 0.09]          |
|                                | Socially hierarchical |                     |                             |                              |
| Average betweenness centrality | Focal                 | Relatively solitary | Gregarious                  | Socially hierarchical        |
|                                | Base                  |                     |                             |                              |
|                                | Relatively solitary   |                     | 0.68 [-2.31, 3.76]          | 0.36 [-2.91, 3.82]           |
|                                | Gregarious            |                     |                             | 0.27 [-2.56, 2.12]           |
|                                | Socially hierarchical |                     |                             |                              |
| Average clustering coefficient | Focal                 | Relatively solitary | Gregarious                  | Socially hierarchical        |
|                                | Base                  |                     |                             |                              |
|                                | Relatively solitary   |                     | -0.06 [-2.49, 2.47]         | <b>-3.40 [-6.56, -0.24]</b>  |
|                                | Gregarious            |                     |                             | <b>-3.30 [-5.82, -0.88]</b>  |
|                                | Socially hierarchical |                     |                             |                              |
| Subgroup cohesion              | Focal                 | Relatively solitary | Gregarious                  | Socially hierarchical        |
|                                | Base                  |                     |                             |                              |
|                                | Relatively solitary   |                     | -0.60 [-2.98, 1.84]         | -0.40 [-3.23, 2.42]          |
|                                | Gregarious            |                     |                             | 0.97 [-1.14, 3.05]           |
|                                | Socially hierarchical |                     |                             |                              |
| Network fragmentation          | Focal                 | Relatively solitary | Gregarious                  | Socially hierarchical        |
|                                | Base                  |                     |                             |                              |
|                                | Relatively solitary   |                     | <b>3.94 [0.74, 7.26]</b>    | 0.11 [-4.01, 4.12]           |
|                                | Gregarious            |                     |                             | <b>-3.27 [-6.11, -0.51]</b>  |
|                                | Socially hierarchical |                     |                             |                              |
| Network diameter               | Focal                 | Relatively solitary | Gregarious                  | Socially hierarchical        |
|                                | Base                  |                     |                             |                              |
|                                | Relatively solitary   |                     | -1.79 [-5.00, 1.45]         | 1.46 [-2.79, 5.52]           |
|                                | Gregarious            |                     |                             | 2.86 [-0.31, 5.89]           |
|                                | Socially hierarchical |                     |                             |                              |

Figure 1:

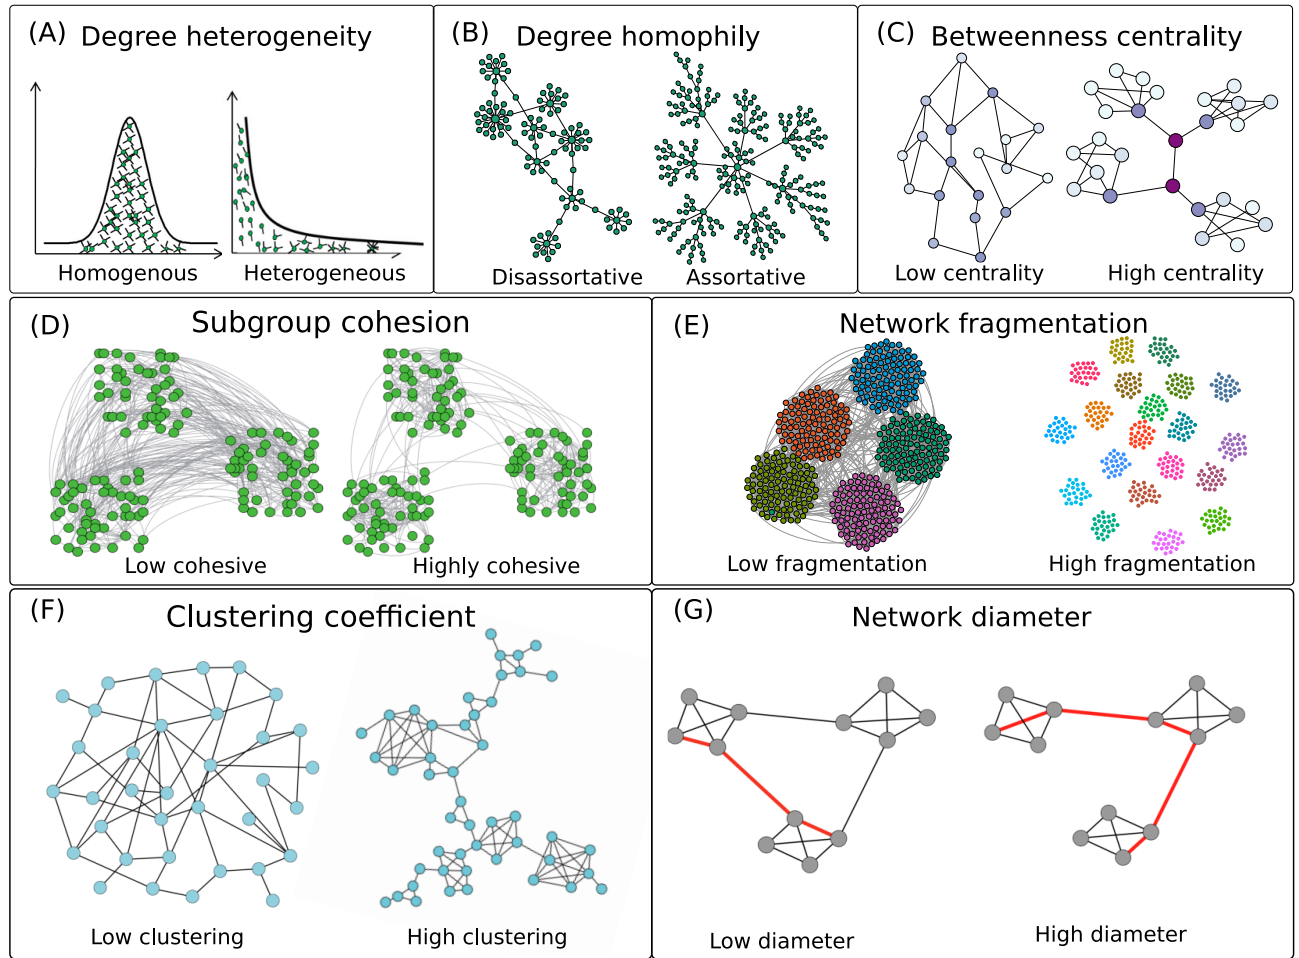

Figure 2:

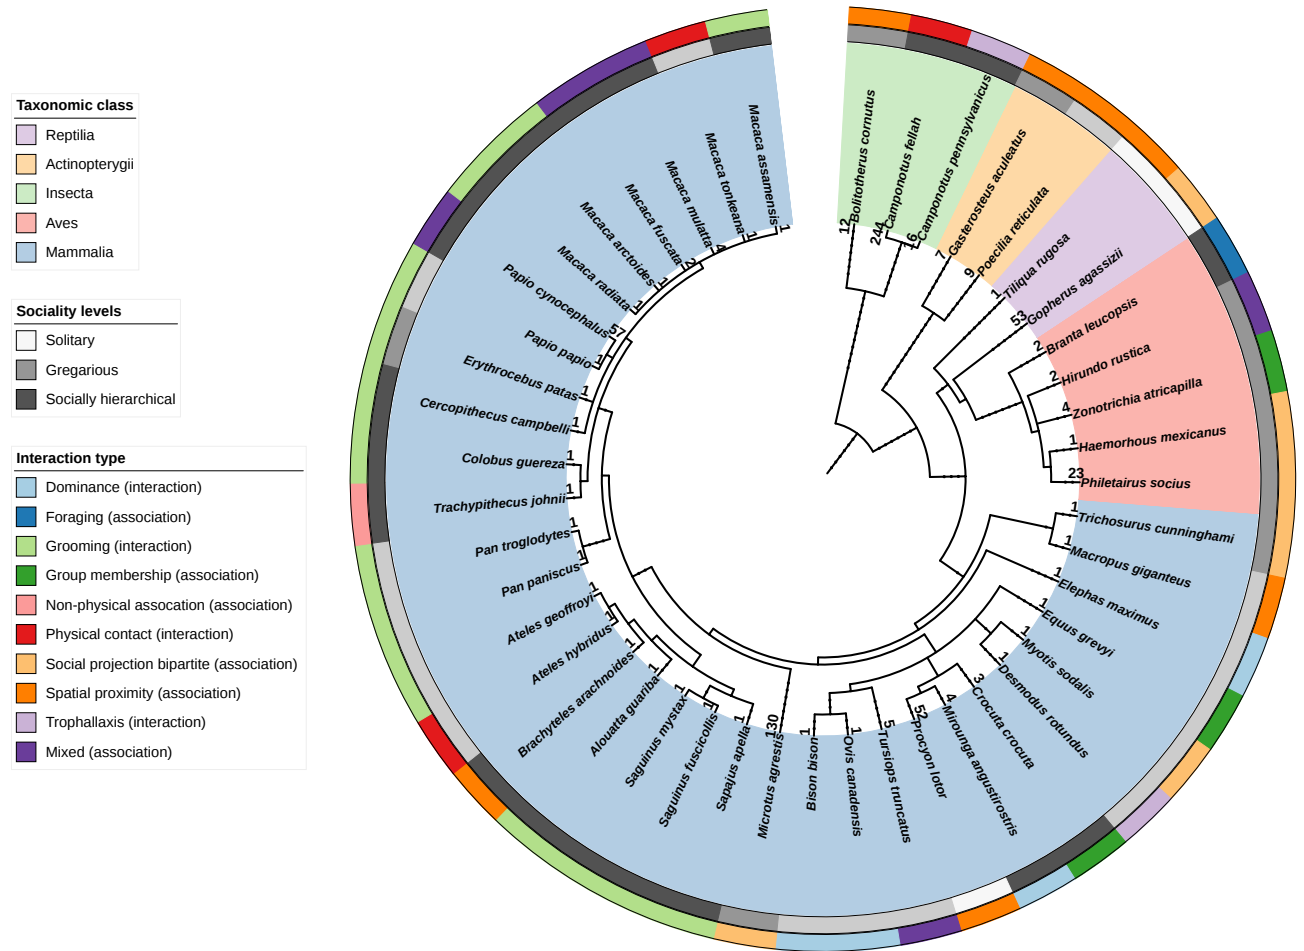

Figure 3:

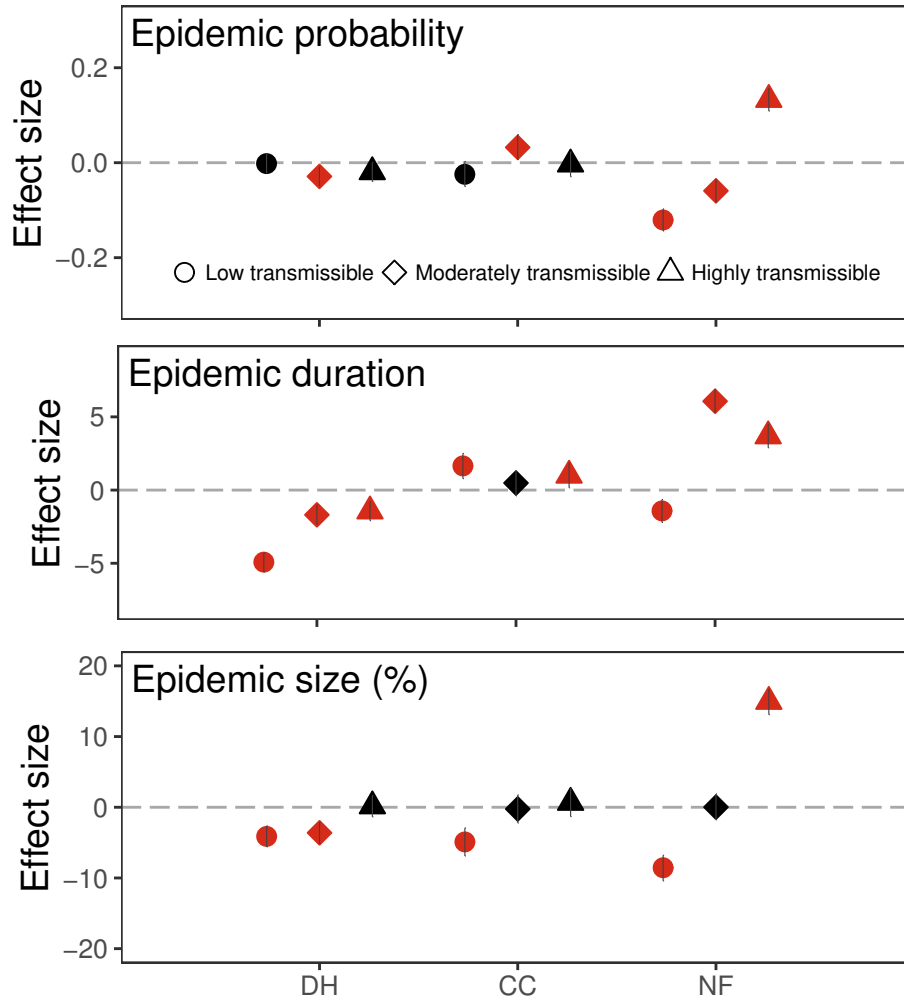

Figure 4:

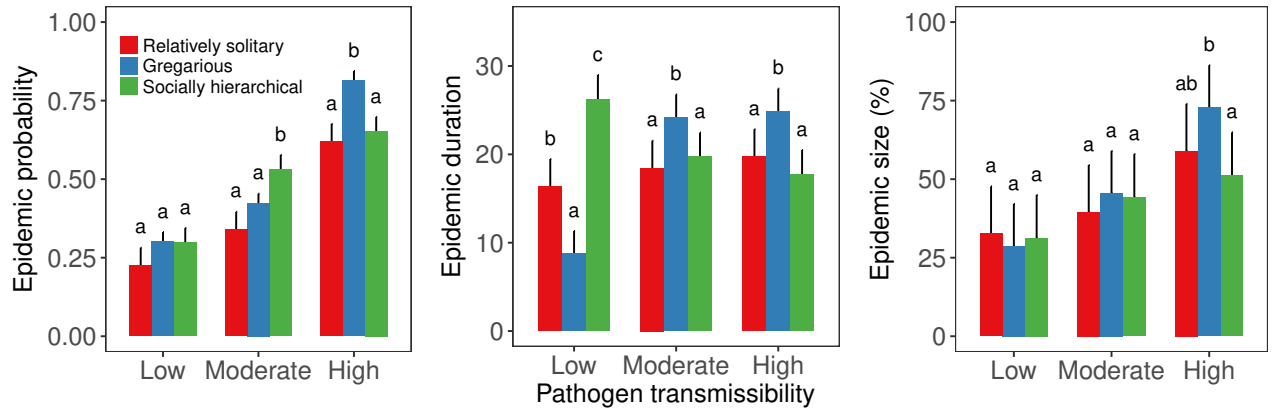

Source: https://www.biorxiv.org/content/biorxiv/early/2017/11/06/106633.full.pdf
